# Supplementary material
Source: MDPI journal article supplement (https://www.mdpi.com/2073-4441/15/6/1060)
Supplement: s1 [file s1 › water-2257187-supplementary.pdf]

## Supplementary material

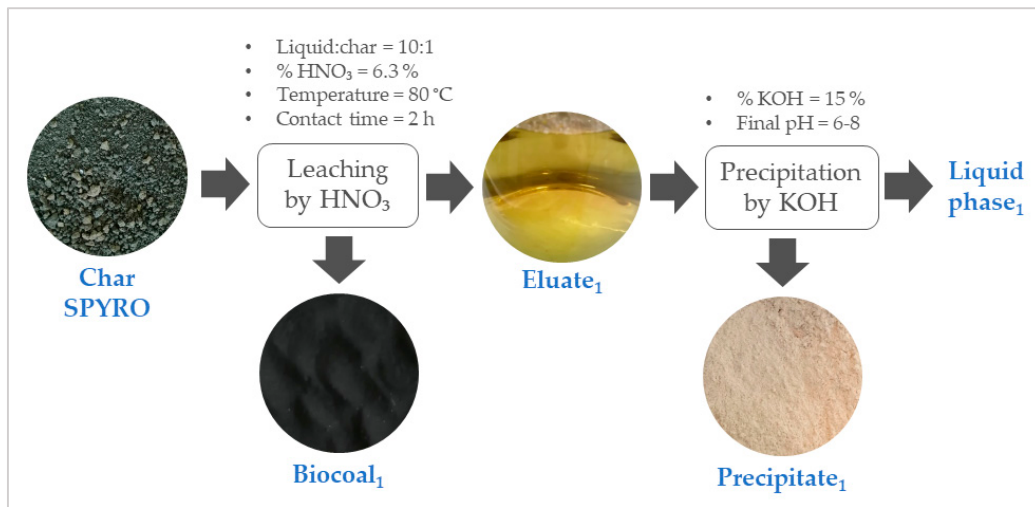

Figure S1. Case 1 process scheme.

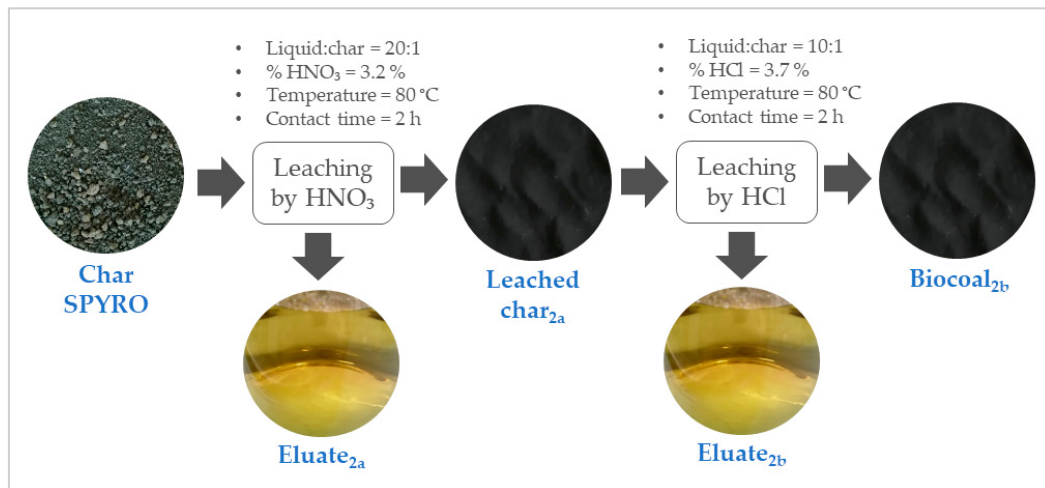

Figure S2. Case 2 process scheme.

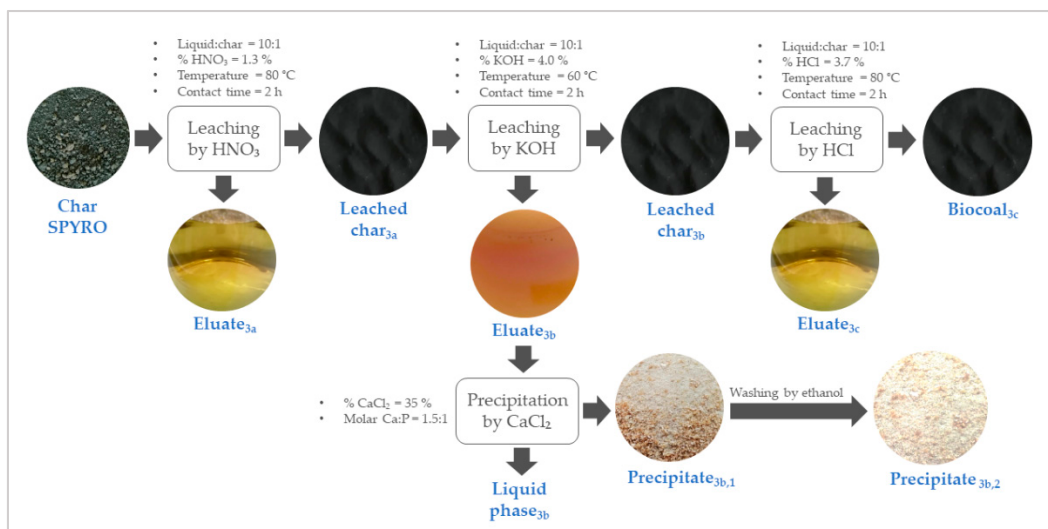

Figure S3. Case 3 process scheme.

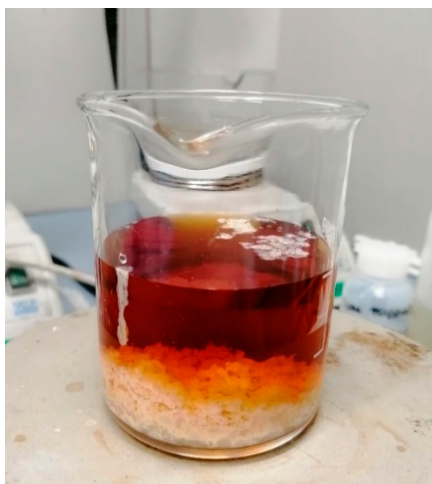

Figure S4. Precipitation by  $\text{CaCl}_2$  applied on the eluate from step b of case 3 (eluate<sub>3b</sub>).

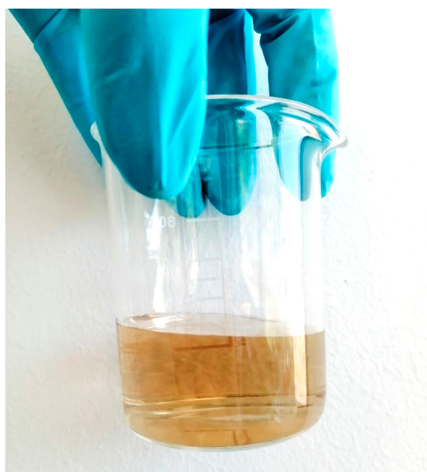

Figure S5. Eluate from step c of case 3 (eluate<sub>3c</sub>).
